# Supplementary material for: Now or later: Health impacts of delaying single‐dose HPV vaccine implementation in a high‐burden setting
Source: PubMed Central journal article supplement (PMC9790243; doi:10.1002/ijc.34054), 2022-05-24

**Supplementary Appendix for:**  
Now or later: Health impacts of delaying single-dose HPV vaccine implementation in a high-burden setting

**Authors:**

Emily A Burger  
Jean-François Laprise  
Stephen Sy  
Mary Caroline Regan  
Kiesha Prem  
Mark Jit  
Marc Brisson  
Jane J Kim

**Table of contents:**

1. Supplementary material & methods, pages 2-5
2. Supplementary results, page 6-8

## 1. Supplementary material & methods

**Appendix Table S1. Scenarios for ‘Analysis 1’ (non-inferior single-dose HPV vaccine) and ‘Analysis 2’ (inferior single-dose HPV vaccine)**

|                             | Scenario | Dosage | Sex | First dose Coverage | Second dose coverage for revaccination for girls aged 10-14 (in 2026) | Second dose coverage for revaccination for girls aged 15-19 (in 2026) | Efficacy | Vaccine duration | Vaccination target ages year 1 | Vaccination Start Year | Vaccination policy switch year** | Revaccination delivery approach |
|-----------------------------|----------|--------|-----|---------------------|-----------------------------------------------------------------------|-----------------------------------------------------------------------|----------|------------------|--------------------------------|------------------------|----------------------------------|---------------------------------|
| Natural history             | 0        | 0      | -   | 0                   |                                                                       |                                                                       | -        | -                | -                              | -                      |                                  | -                               |
| Analysis I: Non-inferior 1D | 1a       | 1      | F   | 70%                 | -                                                                     | -                                                                     | 100%     | Lifelong         | 9, 10-14                       | 2021                   | -                                | -                               |
|                             | 1b       | 1      | F   | 70%                 | -                                                                     | -                                                                     | 100%     | Lifelong         | 9, 10-14                       | 2026                   | -                                | -                               |
| Analysis II: Inferior 1D    | 2        | 2      | F   | 70%                 | -                                                                     | -                                                                     | 100%     | Lifelong         | 9, 10-14                       | 2026                   | -                                | -                               |
|                             | 2a       | 1      | F   | 70%                 | 100%                                                                  | 100%                                                                  | 80%      | Lifelong         | 9, 10-14                       | 2021                   | 2026                             | Targeted                        |
|                             | 2b       | 1      | F   | 70%                 | 0%                                                                    | 0%                                                                    | 80%      | Lifelong         | 9, 10-14                       | 2021                   | 2026                             | --                              |
|                             | 2c       | 1      | F   | 70%                 | 70%*                                                                  | 0%                                                                    | 80%      | Lifelong         | 9, 10-14                       | 2021                   | 2026                             | Campaign                        |
|                             | 2d       | 1      | F   | 70%                 | 100%                                                                  | 100%                                                                  | 80%      | 20               | 9, 10-14                       | 2021                   | 2026                             | Targeted                        |
|                             | 2e       | 1      | F   | 70%                 | 0%                                                                    | 0%                                                                    | 80%      | 20               | 9, 10-14                       | 2021                   | 2026                             | --                              |
|                             | 2f       | 1      | F   | 70%                 | 70%*                                                                  | 0%                                                                    | 80%      | 20               | 9, 10-14                       | 2021                   | 2026                             | Campaign                        |

\*70% coverage applied to both previously vaccinated and unvaccinated girls; \*\*For routine program and previously vaccinated girls, if applicable

**Appendix Figure S1. Single-dose implementation in 2021 with a non-inferior vaccine (A) and ‘delayed’ single-dose implementation in 2026 (B).**

**LEGEND:**

|                                            |                                        |   |                    |
|--------------------------------------------|----------------------------------------|---|--------------------|
| Single dose routine cohorts (70% coverage) | Single dose MAC cohorts (70% coverage) | 1 | Cohorts get 1 dose |
|--------------------------------------------|----------------------------------------|---|--------------------|

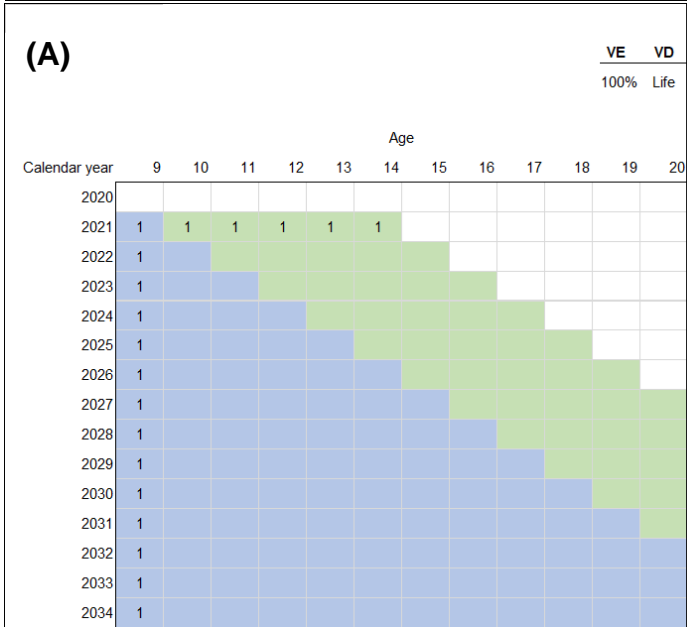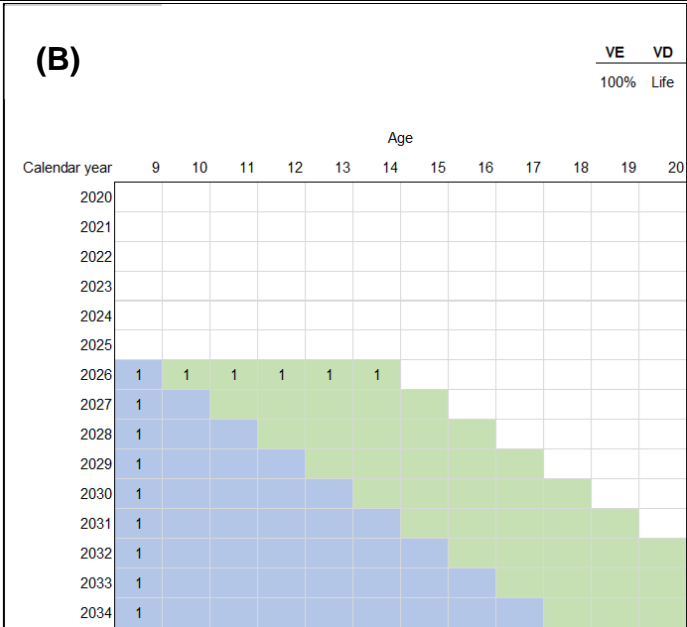

**Appendix Figure S2. Single-dose implementation in 2021 with an inferior vaccine assuming 100% re-vaccination in 2026 (A), 0% revaccination in 2026 (B), campaign delivery revaccination in 2026 (C) and 2-dose delayed vaccination in 2026 (D).**

**LEGEND:**

|                                                                                                                              |                                                                                                                           |                                                                                        |                      |
|------------------------------------------------------------------------------------------------------------------------------|---------------------------------------------------------------------------------------------------------------------------|----------------------------------------------------------------------------------------|----------------------|
| 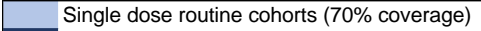 Single dose routine cohorts (70% coverage) |  Single dose MAC cohorts (70% coverage) |  1  | Cohorts get 1 dose   |
|  Routine cohorts with 2nd dose              |  100% MAC cohort with 2nd dose          |  +1 | Cohorts get 2nd dose |
|  Campaign delivery of revaccination         |                                                                                                                           |  2  | Cohorts get 2 doses  |

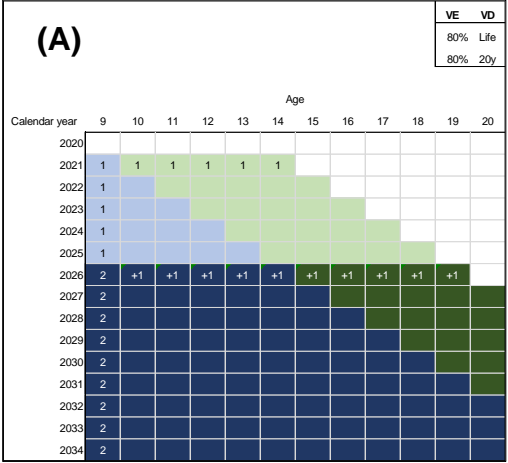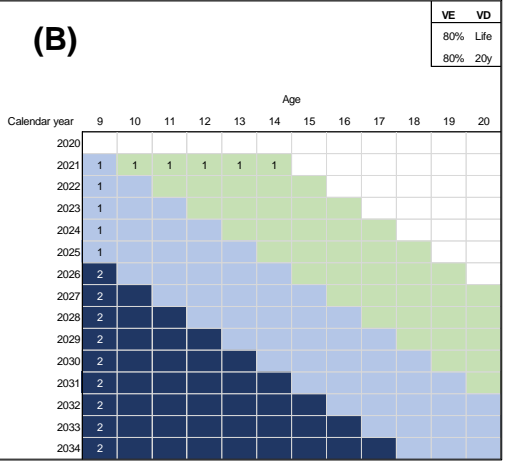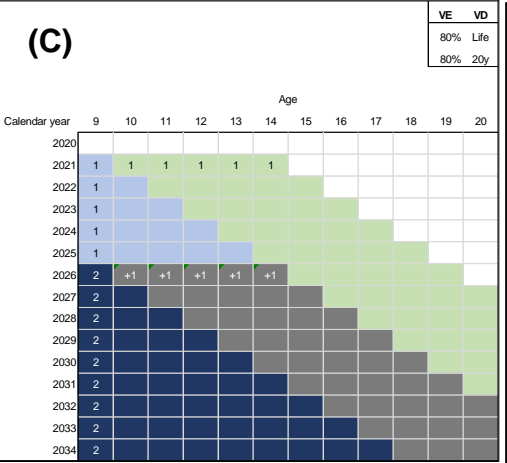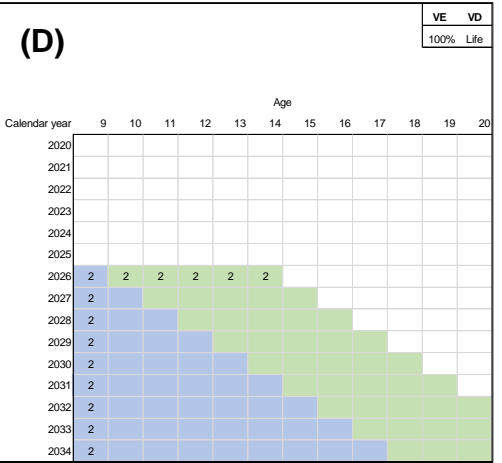

**Appendix Table S2. Standardized 1 million population in 2021 with growth (to 2120) used to estimate cases averted (see methods)**

| Age | Year     |     |          |
|-----|----------|-----|----------|
|     | 2021     | ... | 2120     |
| 0   | 37046.04 | ... | 58027.94 |
| 1   | 36073.72 | ... | 58492.39 |
| 2   | 35008.35 | ... | 58923.59 |
| 3   | 33991.76 | ... | 59321.71 |
| 4   | 33019.85 | ... | 59222.75 |
| 5   | 32088.49 | ... | 59647.95 |
| 6   | 31193.15 | ... | 60050.73 |
| 7   | 30329.38 | ... | 60433.2  |
| 8   | 29494.91 | ... | 60795.89 |
| 9   | 28686.4  | ... | 61140.99 |
| 10  | 27898.58 | ... | 61469.13 |
| 11  | 27129.68 | ... | 61780.96 |
| 12  | 26380.21 | ... | 62078.1  |
| 13  | 25622.92 | ... | 62363.74 |
| 14  | 24844.01 | ... | 62620.94 |
| 15  | 24052.92 | ... | 62848.72 |
| 16  | 23277.28 | ... | 63167.45 |
| 17  | 22517.05 | ... | 63520.03 |
| 18  | 21745.67 | ... | 63806.56 |
| 19  | 20954.49 | ... | 63978.72 |
| 20  | 20156.86 | ... | 64156.02 |
| 21  | 19372.1  | ... | 64293.31 |
| 22  | 18593.23 | ... | 64402.49 |
| 23  | 17856.23 | ... | 64527.31 |
| 24  | 17179.97 | ... | 64679.75 |
| 25  | 16547.41 | ... | 64804.78 |
| 26  | 15925.2  | ... | 64954.02 |
| 27  | 15322.9  | ... | 65115.32 |
| 28  | 14719.78 | ... | 65248.48 |
| 29  | 14103.12 | ... | 65335.04 |
| 30  | 13485.41 | ... | 65419.6  |
| 31  | 12889.93 | ... | 65448.12 |
| 32  | 12309.71 | ... | 65444.13 |
| 33  | 11763.98 | ... | 65456.33 |
| 34  | 11264.01 | ... | 65516.14 |
| 35  | 10799.02 | ... | 65560.78 |
| 36  | 10345.94 | ... | 65556.78 |
| 37  | 9908.016 | ... | 65518    |
| 38  | 9483.341 | ... | 65467.09 |
| 39  | 9068.152 | ... | 65412.59 |

| Age | Year     |     |          |
|-----|----------|-----|----------|
|     | 2021     | ... | 2120     |
| 40  | 8663.06  | ... | 65332.82 |
| 41  | 8272.971 | ... | 65307.35 |
| 42  | 7897.395 | ... | 65316.44 |
| 43  | 7526.602 | ... | 65289.57 |
| 44  | 7156.423 | ... | 65164.14 |
| 45  | 6790.331 | ... | 65012.2  |
| 46  | 6437.158 | ... | 64928.73 |
| 47  | 6096.209 | ... | 64839.15 |
| 48  | 5763.845 | ... | 64659.07 |
| 49  | 5439.452 | ... | 64379.93 |
| 50  | 5125.075 | ... | 64107.37 |
| 51  | 4823.29  | ... | 63655.17 |
| 52  | 4533.647 | ... | 63113.86 |
| 53  | 4261.214 | ... | 62645.42 |
| 54  | 4008.772 | ... | 62358.01 |
| 55  | 3774.523 | ... | 62037.76 |
| 56  | 3552.047 | ... | 61534.34 |
| 57  | 3340.283 | ... | 60984.02 |
| 58  | 3149.817 | ... | 60525.25 |
| 59  | 2984.493 | ... | 60235.57 |
| 60  | 2838.629 | ... | 59930.73 |
| 61  | 2701.023 | ... | 59468.75 |
| 62  | 2571.879 | ... | 58899.88 |
| 63  | 2450.257 | ... | 58318.15 |
| 64  | 2333.95  | ... | 57752.27 |
| 65  | 2221.609 | ... | 57094.72 |
| 66  | 2115.685 | ... | 56791.12 |
| 67  | 2017.448 | ... | 56627.86 |
| 68  | 1909.44  | ... | 56213.27 |
| 69  | 1783.852 | ... | 55219.46 |
| 70  | 1648.249 | ... | 54147.8  |
| 71  | 1517.675 | ... | 53579.62 |
| 72  | 1388.572 | ... | 53135.51 |
| 73  | 1268.994 | ... | 52310.87 |
| 74  | 1164.338 | ... | 50690.68 |
| 75  | 1070.107 | ... | 48958.18 |
| 76  | 977.8381 | ... | 47852.56 |
| 77  | 890.6385 | ... | 46828.05 |
| 78  | 801.2312 | ... | 45219.27 |
| 79  | 705.6509 | ... | 42475.67 |

| Age | Year     |     |          |
|-----|----------|-----|----------|
|     | 2021     | ... | 2120     |
| 80  | 608.5989 | ... | 39537.62 |
| 81  | 517.6381 | ... | 37761.14 |
| 82  | 429.9888 | ... | 36416.8  |
| 83  | 356.8523 | ... | 34372.88 |
| 84  | 304.0746 | ... | 31079.05 |
| 85  | 265.9324 | ... | 27997.55 |
| 86  | 230.4066 | ... | 23737.25 |
| 87  | 201.2583 | ... | 19269.98 |
| 88  | 172.437  | ... | 15854.5  |
| 89  | 140.0182 | ... | 18705.49 |
| 90  | 106.373  | ... | 5714.664 |
| 91  | 74.19943 | ... | 4749.786 |
| 92  | 51.87828 | ... | 4058.975 |
| 93  | 41.8215  | ... | 3215.104 |
| 94  | 30.33387 | ... | 2218.215 |
| 95  | 17.4154  | ... | 1608.635 |
| 96  | 10.95617 | ... | 1387.836 |
| 97  | 8.462414 | ... | 1125.624 |
| 98  | 5.723372 | ... | 822.0398 |
| 99  | 2.779924 | ... | 477.0839 |
| Sum | 1000000  | ... | 5179058  |

## 2. Supplementary results

**Appendix Table S3. Cumulative number of cases over 2021-2120 by scenario (See Appendix Table S1) for the Harvard model**

|                                    | Scenario | Cases  | Averted vs S0 | Averted vs S1b | % increase in averted (immediate vs delay) | Averted vs S2 | % increase in averted (immediate vs delay) |
|------------------------------------|----------|--------|---------------|----------------|--------------------------------------------|---------------|--------------------------------------------|
| <b>Natural history</b>             | 0        | 167344 |               |                |                                            |               |                                            |
| <b>Analysis I: Non-inferior 1D</b> | 1a       | 50144  | 117200        | 5308           | 9.6%                                       |               |                                            |
|                                    | 1b       | 55452  | 111893        |                |                                            |               |                                            |
| <b>Analysis II: Inferior 1D</b>    | 2        | 55452  | 111893        | --             |                                            |               |                                            |
|                                    | 2a       | 50199  | 117146        |                |                                            | 5253          | 9.5%                                       |
|                                    | 2b       | 53131  | 114213        |                |                                            | 2321          | 4.2%                                       |
|                                    | 2c       | 50730  | 116615        |                |                                            | 4722          | 8.5%                                       |
|                                    | 2d       | 50253  | 117092        |                |                                            | 5199          | 9.4%                                       |
|                                    | 2e       | 60417  | 106927        |                |                                            | -4965         | -9.0%                                      |
|                                    | 2f       | 56565  | 110779        |                |                                            | -1113         | -2.0%                                      |

**Appendix Table S4. Cumulative number of cases over 2021-2120 by scenario (See Appendix Table S1) for the HPV-ADVISE model**

|                                    | Scenario | Cases  | Averted vs S0 | Averted vs S1b | % increase in averted (immediate vs delay) | Averted vs S2 | % increase in averted (immediate vs delay) |
|------------------------------------|----------|--------|---------------|----------------|--------------------------------------------|---------------|--------------------------------------------|
| <b>Natural history</b>             | 0        | 192920 |               |                |                                            |               |                                            |
| <b>Analysis I: Non-inferior 1D</b> | 1a       | 76745  | 116174        | 5933           | 7.2%                                       |               |                                            |
|                                    | 1b       | 82679  | 110241        |                |                                            |               |                                            |
| <b>Analysis II: Inferior 1D</b>    | 2        | 82679  | 110241        | --             |                                            |               |                                            |
|                                    | 2a       | 76624  | 116295        |                |                                            | 6054          | 7.3%                                       |
|                                    | 2b       | 79408  | 113511        |                |                                            | 3270          | 4.0%                                       |
|                                    | 2c       | 76988  | 115932        |                |                                            | 5691          | 6.9%                                       |
|                                    | 2d       | 76675  | 116244        |                |                                            | 6003          | 7.3%                                       |
|                                    | 2e       | 79277  | 113643        |                |                                            | 3402          | 4.1%                                       |
|                                    | 2f       | 76921  | 115999        |                |                                            | 5758          | 7.0%                                       |

**Appendix Figure S3. Cervical cancer cases among the 10-14 years-old in 2021 assuming a non-inferior single-dose HPV vaccination program was implemented in 2021 or delayed until 2026, i.e., ‘Analysis 1’ (for the Harvard model only).** Cases are estimated for a starting cohort of 1 million women alive in 2021 over 2021-2120 (inclusive). For the 2026 ‘delay’ scenario, these girls were age-ineligible for vaccination by 2026; therefore, health benefits are indirect only, i.e., herd immunity. The cohort size for the 10-14-year-old 2021 starting cohort is approximately 132,000.

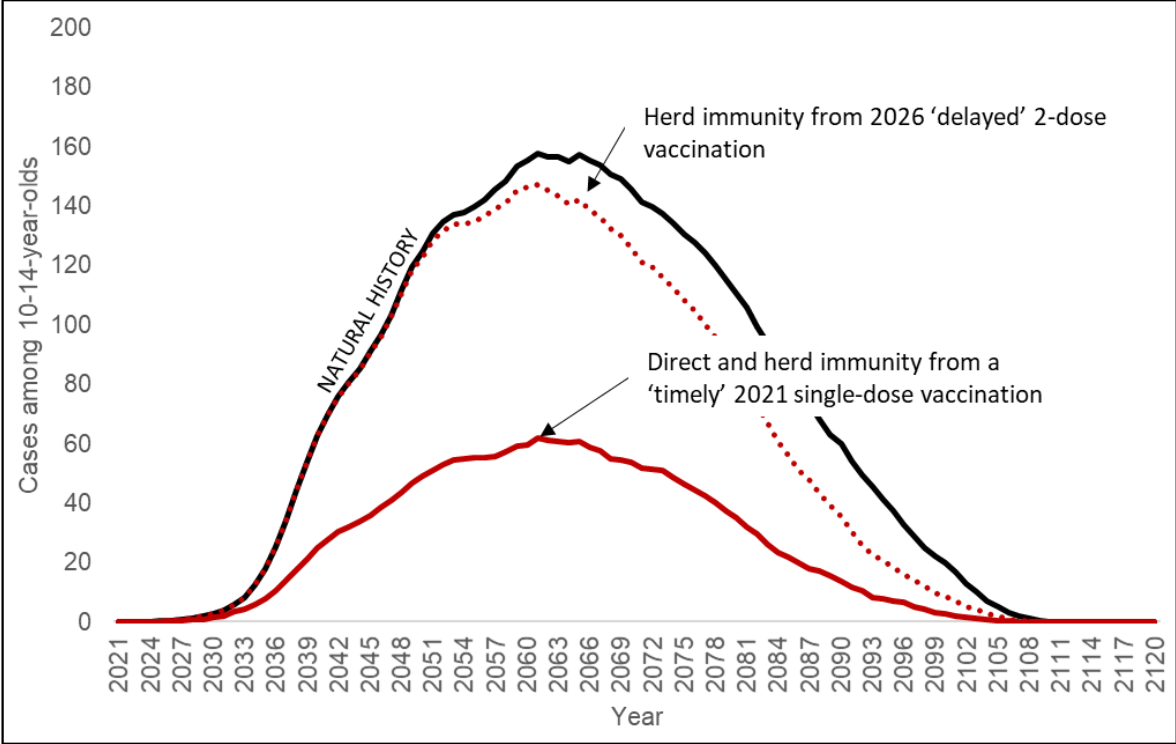

**Appendix Figure S4. Age-standardized incidence per 100,000 women over time by revaccination approach for an inferior (80% efficacy with a 20-year duration (5-year standard deviation)) single dose human papillomavirus (HPV) vaccination program implemented in 2021 with a switch to a 2-dose program in 2026 compared with a delayed 2-dose program implemented in 2026 for the A) Harvard and B) HPV-ADVISE simulation models. Cases averted are compared with a 2-dose vaccination program implemented in 2026 and are estimated for a starting cohort of 1 million women alive in 2021 over 2021-2120 (inclusive). Stochastic noise in HPV-ADVISE leads to a small increase in the number of cases averted for the 100% revaccination scenario compared with the cases averted shown in main manuscript Figure 1.**

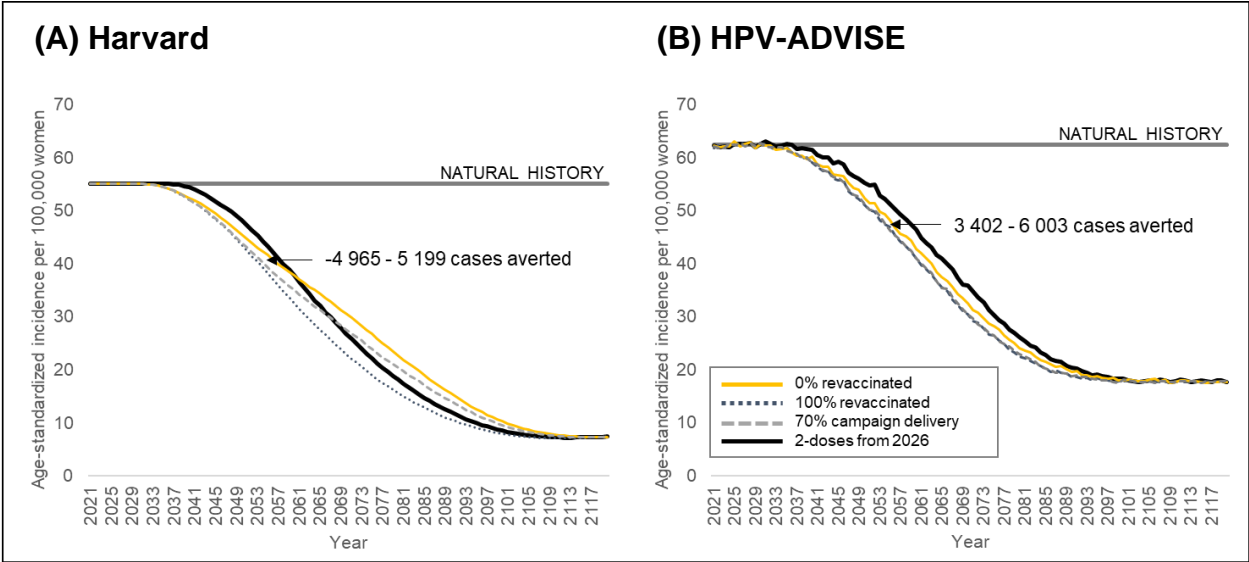

Supplement: IJC-151-1804-s001.pdf [file IJC-151-1804-s001.pdf]
